# Supplementary material
Source: MDPI journal article supplement (https://www.mdpi.com/2311-7524/9/6/641)
Supplement: s1 [file s1]

## Supplementary Material

Supplementary Table S1. ABS and HLB presence (+) or absence (-) after three years of evaluations on mandarin groups and hybrids from the Genebanks of the Instituto Agronômico de Campinas (IAC) (BAG Citros IAC), IAC Breeding Program and the Estação Experimental de Citricultura de Bebedouro (EECB).

| Mandarin group | Common Name                   | ABS fruit | ABS plant | HLB plant |
|----------------|-------------------------------|-----------|-----------|-----------|
| clementine     | 16MPF21                       | -         | -         | +         |
| clementine     | 2KR Monreal                   | -         | -         | +         |
| clementine     | Bruno SRA 531                 | -         | -         | +         |
| clementine     | Clementina x Honey IAC 1388   | -         | -         | +         |
| clementine     | Clementina x Mexerica IAC 934 | -         | -         | +         |
| clementine     | Clemenules SPA 17             | -         | -         | +         |
| clementine     | de Nules VCR                  | -         | -         | +         |
| clementine     | IAC 1427                      | -         | -         | +         |
| clementine     | IAC 1436                      | -         | -         | +         |
| clementine     | IAC 1527                      | -         | -         | +         |
| clementine     | Marisol                       | -         | -         | +         |
| clementine     | Marisol I                     | -         | -         | +         |
| clementine     | Nules IAC 1742                | -         | -         | +         |
| clementine     | Oronules                      | -         | -         | +         |
| clementine     | Oroval                        | -         | -         | +         |
| clementine     | Tomatera                      | -         | -         | +         |
| common         | 1/28 FCAV [LCD] EECB 43       | -         | -         | +         |
| common         | 1/43 [LCD] EECB 30            | -         | +         | +         |
| common         | À Peau Lisse SRA 267          | -         | -         | +         |
| common         | África do Sul IAC 557         | +         | +         | +         |
| common         | Batangas IAC 504              | -         | +         | +         |
| common         | Batangas IAC 505              | -         | +         | +         |
| common         | Beauty of Glen Retreat        | -         | +         | +         |
| common         | Burgess                       | -         | +         | +         |
| common         | Caçula 3 IAC 1330             | +         | +         | +         |
| common         | Caçula 4 IAC 1318             | +         | +         | +         |
| common         | Cape Nartjee IAC 522          | -         | +         | +         |
| common         | Cape Nartjee IAC 523          | -         | +         | +         |
| common         | Carvalhais de Vidigueira      | +         | +         | +         |
| common         | Carvalhais IAC 546            | -         | -         | +         |
| common         | Cravo IAC 182                 | -         | -         | +         |
| common         | De Wildt IAC 545              | +         | +         | +         |
| common         | Encore                        | -         | -         | +         |
| common         | Fallglo IAC 1427              | -         | -         | +         |
| common         | Fewtrll                       | -         | +         | +         |
| common         | Fortune                       | +         | +         | +         |
| common         | Fremont 5-1                   | -         | -         | +         |
| common         | Fremont 5-2                   | -         | -         | +         |
| common         | Fremont 5-3                   | -         | -         | +         |
| common         | Fremont 9-1                   | -         | -         | +         |
| common         | Fremont 9-2                   | -         | -         | +         |
| common         | Fremont 9-3                   | -         | -         | +         |
| common         | Fremont IAC 543               | -         | -         | +         |
| common         | IAC 1717                      | -         | -         | +         |
| common         | Imperatriz IAC 565            | +         | +         | +         |
| common         | Junqueira IAC 721             | -         | +         | +         |
| common         | King x Dancy IAC 1378         | +         | +         | +         |
| common         | Kinnow IAC 176                | -         | +         | +         |
| common         | Ladu IAC 539                  | -         | -         | +         |
| common         | Ladu x Szinkon IAC 552        | -         | -         | +         |
| common         | Lebom                         | -         | +         | +         |
| common         | Loose Jacket IAC 515          | +         | +         | +         |
| common         | Montevideo IAC 438            | +         | +         | +         |

|         |                                  |   |   |   |
|---------|----------------------------------|---|---|---|
| common  | Muscia IAC 607                   | + | + | + |
| common  | Oneco IAC 173                    | + | + | + |
| common  | Ponkan casca verde IAC 1722      | - | - | + |
| common  | Ponkan casca verde IAC 722       | - | - | + |
| common  | Ponkan Chiaradia IAC 1484        | - | + | + |
| common  | Ponkan IAC 172                   | - | + | + |
| common  | Ponkan IAC 222                   | - | + | + |
| common  | Ponkan IAC 224                   | - | + | + |
| common  | Ponkan IAC 225                   | - | + | + |
| common  | Ponkan IAC 226                   | - | + | + |
| common  | Ponkan IAC 445                   | - | + | + |
| common  | Ponkan Nanine                    | - | + | + |
| common  | Red Skin                         | + | + | + |
| common  | Rodeking SRA 431                 | - | - | + |
| common  | Rosehaugh Nartjee IAC 555        | - | + | + |
| common  | Span IAC 1423                    | - | + | + |
| common  | Span IAC 595                     | - | + | + |
| common  | Sunwikon IAC 576                 | + | - | + |
| common  | Sunwuikon IAC 562                | - | - | + |
| common  | Swatow IAC 171                   | - | + | + |
| common  | Sylhat IAC 512                   | + | + | + |
| common  | Szinkon x Ladu IAC 548           | - | - | + |
| common  | Szuwinkon IAC 571                | - | + | + |
| common  | Szwinkon x Szinkon Tizon IAC 560 | + | + | + |
| common  | Tankan IAC 502                   | - | - | + |
| common  | Tuxpan IAC 170                   | - | + | + |
| common  | Wallent SRA 438                  | - | - | + |
| common  | Warnuco IAC 547                  | - | + | + |
| common  | Wilking IAC 177                  | - | + | + |
| common  | Yoshida EECB 227                 | - | - | + |
| common  | Zanzibar SRA 442                 | - | - | + |
| common  | Szinkon x Tizon IAC 568          | - | + | + |
| satsuma | Hashimoto                        | - | - | + |
| satsuma | Miyagawa SRA 444                 | - | - | + |
| satsuma | Ovari                            | - | - | + |
| satsuma | Wase IAC 213                     | - | - | + |
| satsuma | Okitsu                           | - | - | + |
| tangelo | Clemenville Alcazar IAC 931      | + | + | + |
| tangelo | Dweet IAC 1721                   | + | + | + |
| tangelo | Ellendale CCC-411                | - | + | + |
| tangelo | Lee IAC 441                      | + | + | + |
| tangelo | Nova IAC 1853                    | + | + | + |
| tangelo | Nova SPA 03                      | + | + | + |
| tangelo | Osceola IAC 443                  | + | + | + |
| tangelo | Page IAC 1525                    | + | + | + |
| tangelo | Robinson IAC 442                 | - | + | + |
| tangelo | Ellendale early IAC 1314         | - | - | + |
| tangor  | Dekopon                          | - | + | + |
| tangor  | IAC 2019Maria                    | - | - | + |
| tangor  | MC x LP 140                      | - | - | + |
| tangor  | MC x LP 319                      | - | - | + |
| tangor  | MC x LP 355                      | - | - | + |
| tangor  | MC x LP 367                      | - | - | + |
| tangor  | MC x LP 38                       | - | - | + |
| tangor  | MC x LP 386                      | - | - | + |
| tangor  | MC x LP 7                        | - | - | + |
| tangor  | MC x LP 707                      | - | - | + |
| tangor  | Murcott IAC 221                  | + | + | + |
| tangor  | Murcott J IAC 1502               | + | + | + |
| tangor  | Murcott Precoce IAC 1578         | + | + | + |
| tangor  | Olé                              | + | + | + |
| tangor  | Ortanique Hybrid                 | + | - | + |
| tangor  | Ortanique IAC 554                | - | - | + |
| tangor  | OTA 14                           | - | - | + |
| tangor  | Satsuma x Natal 3 EECB 12        | - | - | + |

|             |                                |   |   |   |
|-------------|--------------------------------|---|---|---|
| tangor      | TC x LP 24                     | - | + | + |
| tangor      | TC x LP 48                     | + | + | + |
| tangor      | Thomas IAC 519                 | - | - | + |
| tangor      | TM x LP 124                    | + | + | + |
| tangor      | TM x LP 157                    | + | + | + |
| tangor      | TM x LP 175                    | + | + | + |
| tangor      | TM x LP 203i                   | - | - | + |
| tangor      | TM x LP 217                    | + | + | + |
| tangor      | TM x LP 222                    | + | + | + |
| tangor      | TM x LP 246                    | + | + | + |
| tangor      | TM x LP 253                    | + | + | + |
| tangor      | TM x LP 258                    | + | + | + |
| tangor      | TM x LP 321                    | + | + | + |
| tangor      | TM x LP 33                     | + | + | + |
| tangor      | TM x LP 353                    | + | + | + |
| tangor      | TM x LP 358                    | - | + | + |
| tangor      | TM x LP 370                    | + | + | + |
| tangor      | TM x LP 61                     | + | + | + |
| tangor      | TM x LP 87                     | - | - | + |
| tangor      | TM x LP 265                    | + | + | + |
| tangor      | TM x LP 264                    | - | + | + |
| tangor      | TM x LV 15                     | - | + | + |
| tangor      | TM x TP 02                     | - | + | + |
| tangor      | TM x TP 03                     | + | + | + |
| tangor      | TM x TP 04                     | + | + | + |
| tangor      | TM x TP 05                     | + | + | + |
| tangor      | TM x TP 07                     | + | + | + |
| tangor      | TM x TP 08                     | + | + | + |
| tangor      | TM x TP 09                     | - | - | + |
| tangor      | TM x TP 11                     | - | - | + |
| tangor      | TM x TP 12                     | + | + | + |
| tangor      | TM x TP 13                     | + | + | + |
| tangor      | W Murcott                      | + | + | + |
| willow leaf | Avana Apireno IAC 1739         | - | - | + |
| willow leaf | Avana IAC 594                  | - | - | + |
| willow leaf | Córsega IAC 586                | - | - | + |
| willow leaf | Imperial IAC 1331              | - | - | + |
| willow leaf | Ipanema IAC 208                | - | - | + |
| willow leaf | irradiação IAC 1631            | - | - | + |
| willow leaf | Israel IAC 599                 | - | - | + |
| willow leaf | Late IAC 585                   | - | - | + |
| willow leaf | mexerica x clementina IAC 1545 | - | - | + |
| willow leaf | Mildura IAC 1312               | - | - | + |
| willow leaf | Mogi das Cruzes IAC 606        | - | - | + |
| willow leaf | Montenegrina                   | - | - | + |
| willow leaf | Nobilis IAC 199                | - | - | + |
| willow leaf | Paiva IAC 588                  | - | - | + |
| willow leaf | Pará IAC 193                   | - | - | + |
| willow leaf | Paulista IAC 567               | - | - | + |
| willow leaf | Pernambucana IAC 578           | - | - | + |
| willow leaf | BRS Rainha                     | - | - | + |
| willow leaf | Rio IAC 194                    | - | - | + |
| willow leaf | Rio IAC 584                    | - | - | + |
| willow leaf | Siracusa IAC 590               | - | - | + |
| willow leaf | Tardia da Sicília IAC 589      | - | - | + |
| willow leaf | Tardia IAC 582                 | - | - | + |
| willow leaf | Tardia IAC 591                 | - | - | + |
| willow leaf | Tardia IAC 592                 | - | - | + |
| willow leaf | Victória IAC 580               | - | - | + |
| willow leaf | Willow IAC 196                 | - | - | + |
